# Supplementary material for: HIF1α-regulated glycolysis promotes activation-induced cell death and IFN-γ induction in hypoxic T cells
Source: Springer Nature journal article supplement (doi:10.1038/s41467-024-53593-8), 2024-10-30
Supplement: MOESM1 [file 41467_2024_53593_MOESM1_ESM.pdf]

## Supplementary Information

HIF1 $\alpha$ -glycolysis engages activation-induced cell death to drive IFN- $\gamma$  induction in hypoxic T cells

Hongxing Shen<sup>1</sup>, Oluwagbemiga A. Ojo<sup>1</sup>, Haitao Ding<sup>1</sup>, Logan J. Mullen<sup>2</sup>, Chuan Xing<sup>1</sup>, M. Iqbal Hossain<sup>3</sup>, Abdelrahman Yassin<sup>1</sup>, Vivian Y. Shi<sup>1</sup>, Zach Lewis<sup>1</sup>, Ewa Podgorska<sup>1</sup>, Shaida A. Andrabi<sup>3</sup>, Maciek R. Antoniewicz<sup>4</sup>, James A. Bonner<sup>1,5</sup>, and Lewis Zhichang Shi<sup>1,3,5,6,\*</sup>

<sup>1</sup>Department of Radiation Oncology, Heersink School of Medicine, University of Alabama at Birmingham (UAB-SOM), Birmingham, AL 35233, USA.

<sup>2</sup>Genomics Core Laboratory, Institute of Arctic Biology, University of Alaska Fairbanks, Fairbanks, Alaska, 99775, USA.

<sup>3</sup>Department of Pharmacology and Toxicology, UAB-SOM, USA

<sup>4</sup>Department of Chemical Engineering, University of Michigan, Ann Arbor, MI 48109, USA.

<sup>5</sup>O'Neal Comprehensive Cancer Center, UAB-SOM, USA

<sup>6</sup>Department of Microbiology and Immunology Institute, UAB-SOM, USA

\*Correspondence author: [Lewisshi@uabmc.edu](mailto:Lewisshi@uabmc.edu).

### Supplemental Figures 1-8

Figure S1. HIF1 $\alpha$  but not HIF2 $\alpha$  controls IFN- $\gamma$  induction in hypoxic T cells, *in vitro*.

Figure S2. HIF1 $\alpha$ -glycolysis drives IFN- $\gamma$  induction in hypoxic T cells.

Figure S3. Direct regulation of IFN- $\gamma$  induction in hypoxic T cells by HIF1 $\alpha$  and intracellular acetyl CoA, *in vitro*.

Figure S4. Reduced IFN- $\gamma$  production in *Hif1* $\alpha^{-/-}$  T cells is not due to proliferative defect.

Figure S5. Attenuated AICD in *Hif1* $\alpha^{-/-}$  T cells is not mediated by extrinsic factors.

Figure S6. HIF1 $\alpha$  controls effector function of TILs.

Figure S7. HIF1 $\alpha$  in T cells governs therapeutic effects of ICB.

Figure S8 FACS gating strategies.

### Supplemental Tables 1-3

Supplemental Table 1. List of flow antibodies used in this manuscript.

Supplemental Table 2. List of Western Blot antibodies used in this manuscript.

Supplemental Table 3. List of real-time PCR primers used in this manuscript.

Supplemental Fig. 1

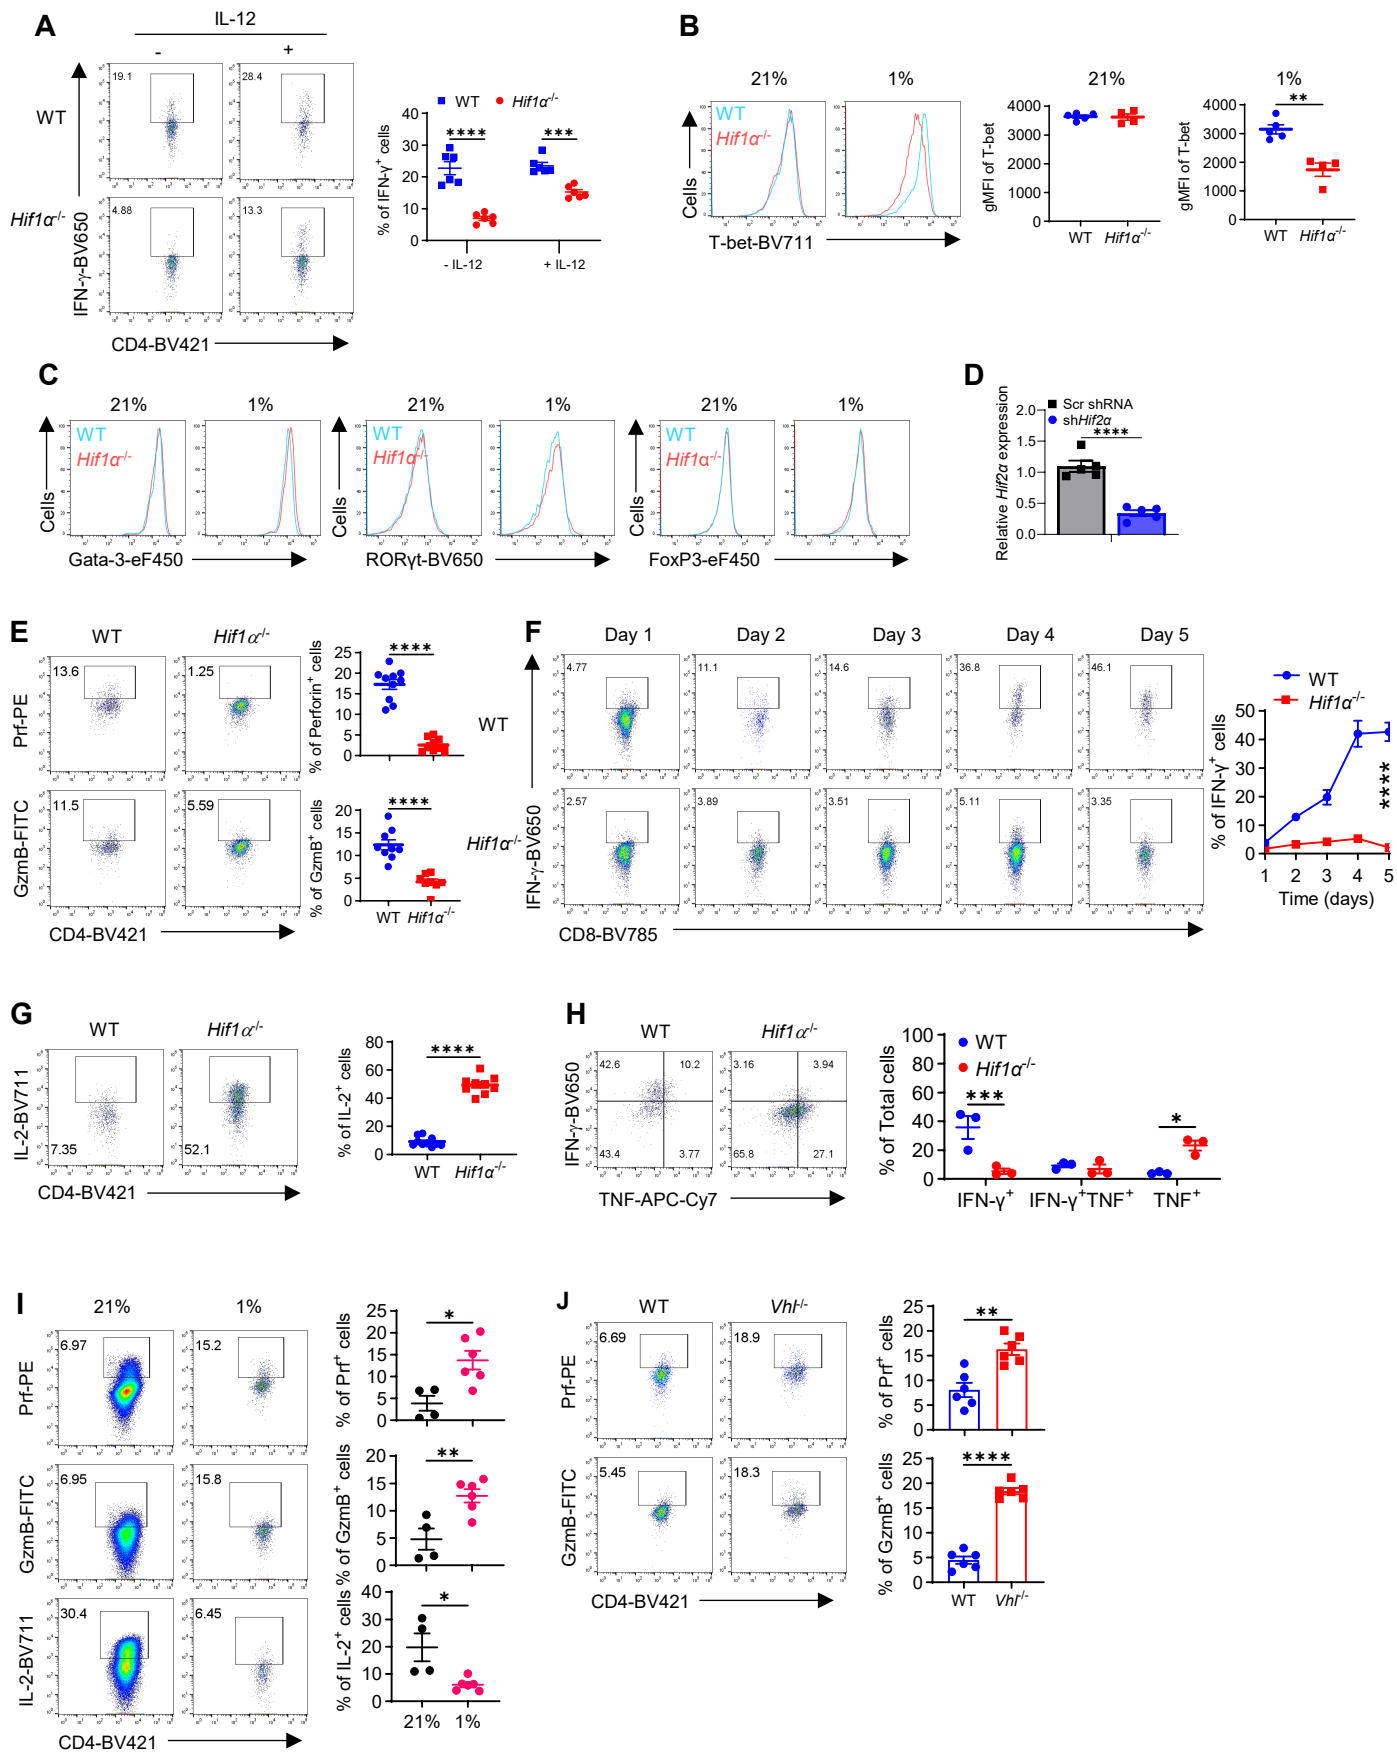

**Figure S1. *Hif1α* but not *Hif2α* controls IFN-γ induction in hypoxic T cells, *in vitro*.**

**A.** Naïve CD4<sup>+</sup> T cells isolated from WT and *Hif1α*<sup>-/-</sup> mice were activated under hypoxia for 5 days, with or without IL-12, followed by IFN-γ detection (*N* = 6, \*\*\*\**p* < 0.0001, \*\*\**p* = 0.0003). **B-C.** Histogram overlays of T-bet (**B**) and Gata-3, RORγt and FoxP3 (**C**) expression in WT (*N* = 5) and *Hif1α*<sup>-/-</sup> (*N* = 4) CD4<sup>+</sup> T cells, activated under normoxia and hypoxia for 2 days (\*\**p* = 0.0013). **D.** Activated CD4<sup>+</sup> T cells were transduced with retroviruses expressing scrambled shRNA (Scr shRNA) or *shHif2α*, followed by RT-PCR to check *Hif2α* mRNA expression (*N* = 5, \*\*\*\**p* < 0.0001). **E.** Production of perforin (Prf) and granzyme B (GzmB) in WT and *Hif1α*<sup>-/-</sup> CD4<sup>+</sup> T cells activated in hypoxia for 5 days (*N* = 10, \*\*\*\**p* < 0.0001, \*\*\**p* = 0.0003, \**p* = 0.013). **F.** Naïve WT (*N* = 3) and *Hif1α*<sup>-/-</sup> (*N* = 6) CD8<sup>+</sup> T cells were activated under hypoxia (1% O<sub>2</sub>). IFN-γ production was assessed daily from Day 1-5 (\*\*\*\**p* < 0.0001). **G-H.** IL-2 (**G**) (*N* = 10) and IFN-γ+TNF<sup>+</sup> (**H**) (*N* = 3) by WT and *Hif1α*<sup>-/-</sup> CD4<sup>+</sup> T cells activated in hypoxia for 5 days (\*\*\*\**p* < 0.0001, \*\*\**p* = 0.0003, \**p* = 0.013). **I.** Production of Prf (\**p* = 0.0112), GzmB (\*\**p* = 0.0063), and IL-2 (\**p* = 0.0112) in CD4<sup>+</sup> T cells activated under normoxia (21% O<sub>2</sub>, *N* = 4) and hypoxia (1% O<sub>2</sub>, *N* = 6) for 5 days. **J.** Production of Prf (\*\**p* = 0.0012) and GzmB (\*\*\*\**p* < 0.0001) in WT (*N* = 6) or *Vhl*<sup>-/-</sup> (*N* = 6) CD4<sup>+</sup> T cells activated under hypoxia for 5 days. A two-sided Student's t-test was used in **B, D, F-G, I-J** for statistical analyses. Two-way ANOVA with Šídák's multiple comparisons test (with adjustment) was used for **A, E** and **H**. All the experiments were repeated at least twice. Pooled results shown in the dot plots and bar graphs depicted means ± SEM for all samples in each group, with each dot denoting an independent sample. Source data are provided as a Source Data file.

Supplemental Figure 2

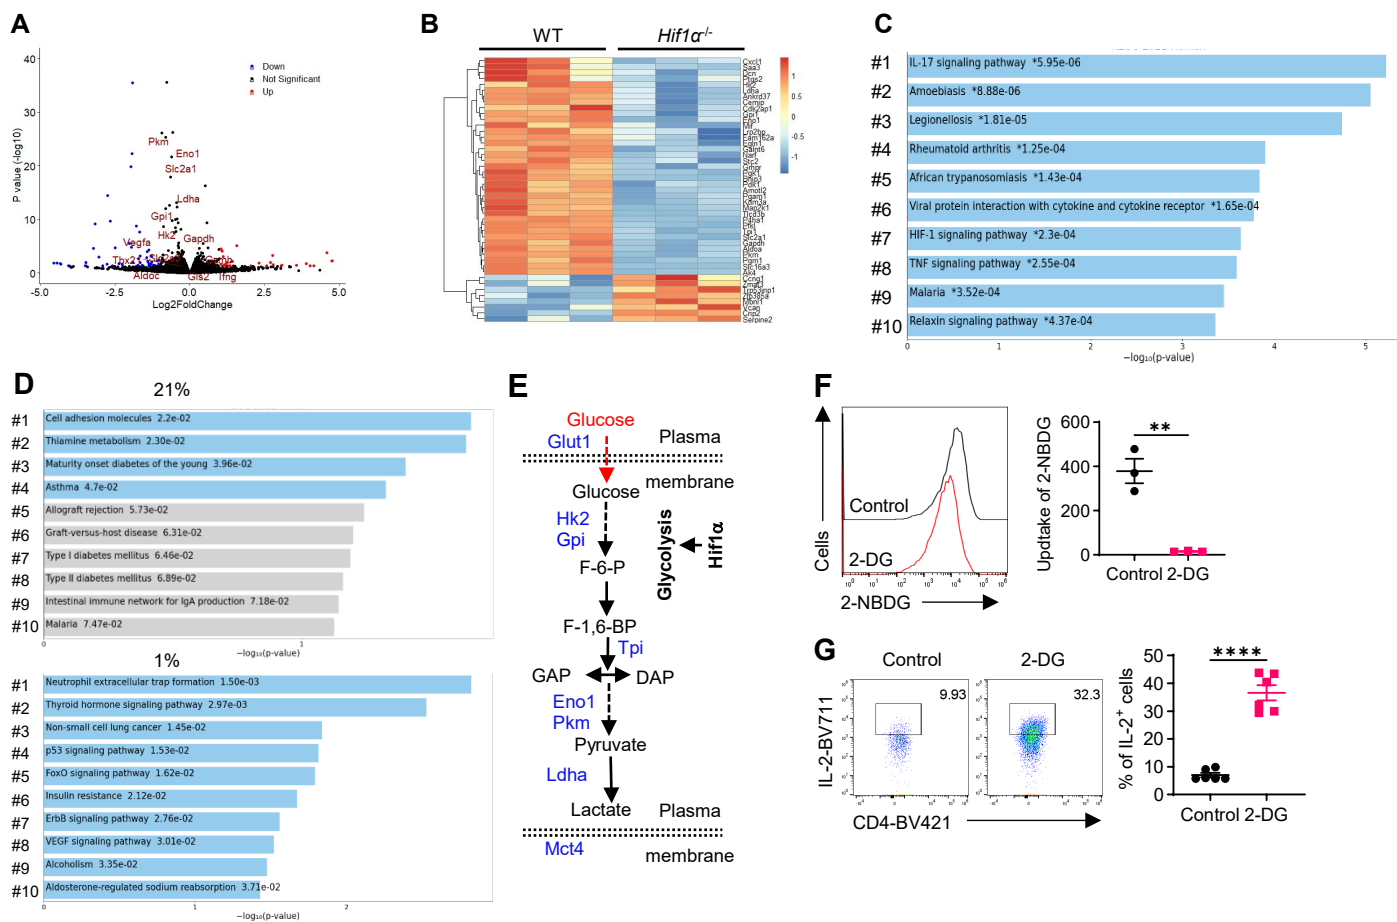

**Fig. S2 *Hif1* $\alpha$ -glycolysis drives IFN- $\gamma$  induction in hypoxic T cells.**

**A-C.** Total RNAs extracted from WT and *Hif1* $\alpha$ <sup>-/-</sup> CD4<sup>+</sup> T cells activated under normoxia for 48h were subjected to RNA-Seq. The gene expression analyses were performed using DESeq2 (version 1.34.0). The Wald test was used to calculate the *p* values and log<sub>2</sub> fold changes. Genes with an adjusted *p* value < 0.05 and absolute log<sub>2</sub> fold change > 1 were considered as differentially expressed genes (DEGs). A volcano plot was used to show all upregulated and downregulated DEGs using the ggplot2 R package (**A**), with top 50 identified DEGs shown in a heatmap (**B**). Top 10 enriched signaling pathways (downregulated) from Enriched Kyoto Encyclopedia of Genes and Genomes (KEGG) analyses of DEGs were shown in (**C**). Significant terms of the KEGG pathways were selected with a *p* value < 0.05. **D.** Significantly upregulated top 10 enriched signaling pathways in *Hif1* $\alpha$ <sup>-/-</sup> CD4<sup>+</sup> T cells activated under normoxia (21% O<sub>2</sub>) (Upper Panel) and hypoxia (1% O<sub>2</sub>) (Lower Panel). **E.** A diagram of the glycolytic pathway, with the major glycolytic genes highlighted in blue. **F.** Uptake of 2-NBDG by activated naïve CD4 T cells treated with solvent (Control) or 0.5  $\mu$ M of 2-DG (*N* = 3 per group, \*\**p* = 0.0027). **G.** IL-2 production by WT CD4<sup>+</sup> T cells activated under hypoxia for 5 days, treated with solvent (Control) or 0.5  $\mu$ M of 2-DG (*N* = 6 per group, \*\*\*\**p* < 0.0001). A two-sided Student's t-test was used in **F** and **G** for statistical analyses. All the experiments were repeated at least twice. Pooled results shown in the dot plots and bar graphs depicted means  $\pm$  SEM for all samples in each group, with each dot denoting an independent sample. Source data are provided as a Source Data file.

### Supplemental Figure 3.

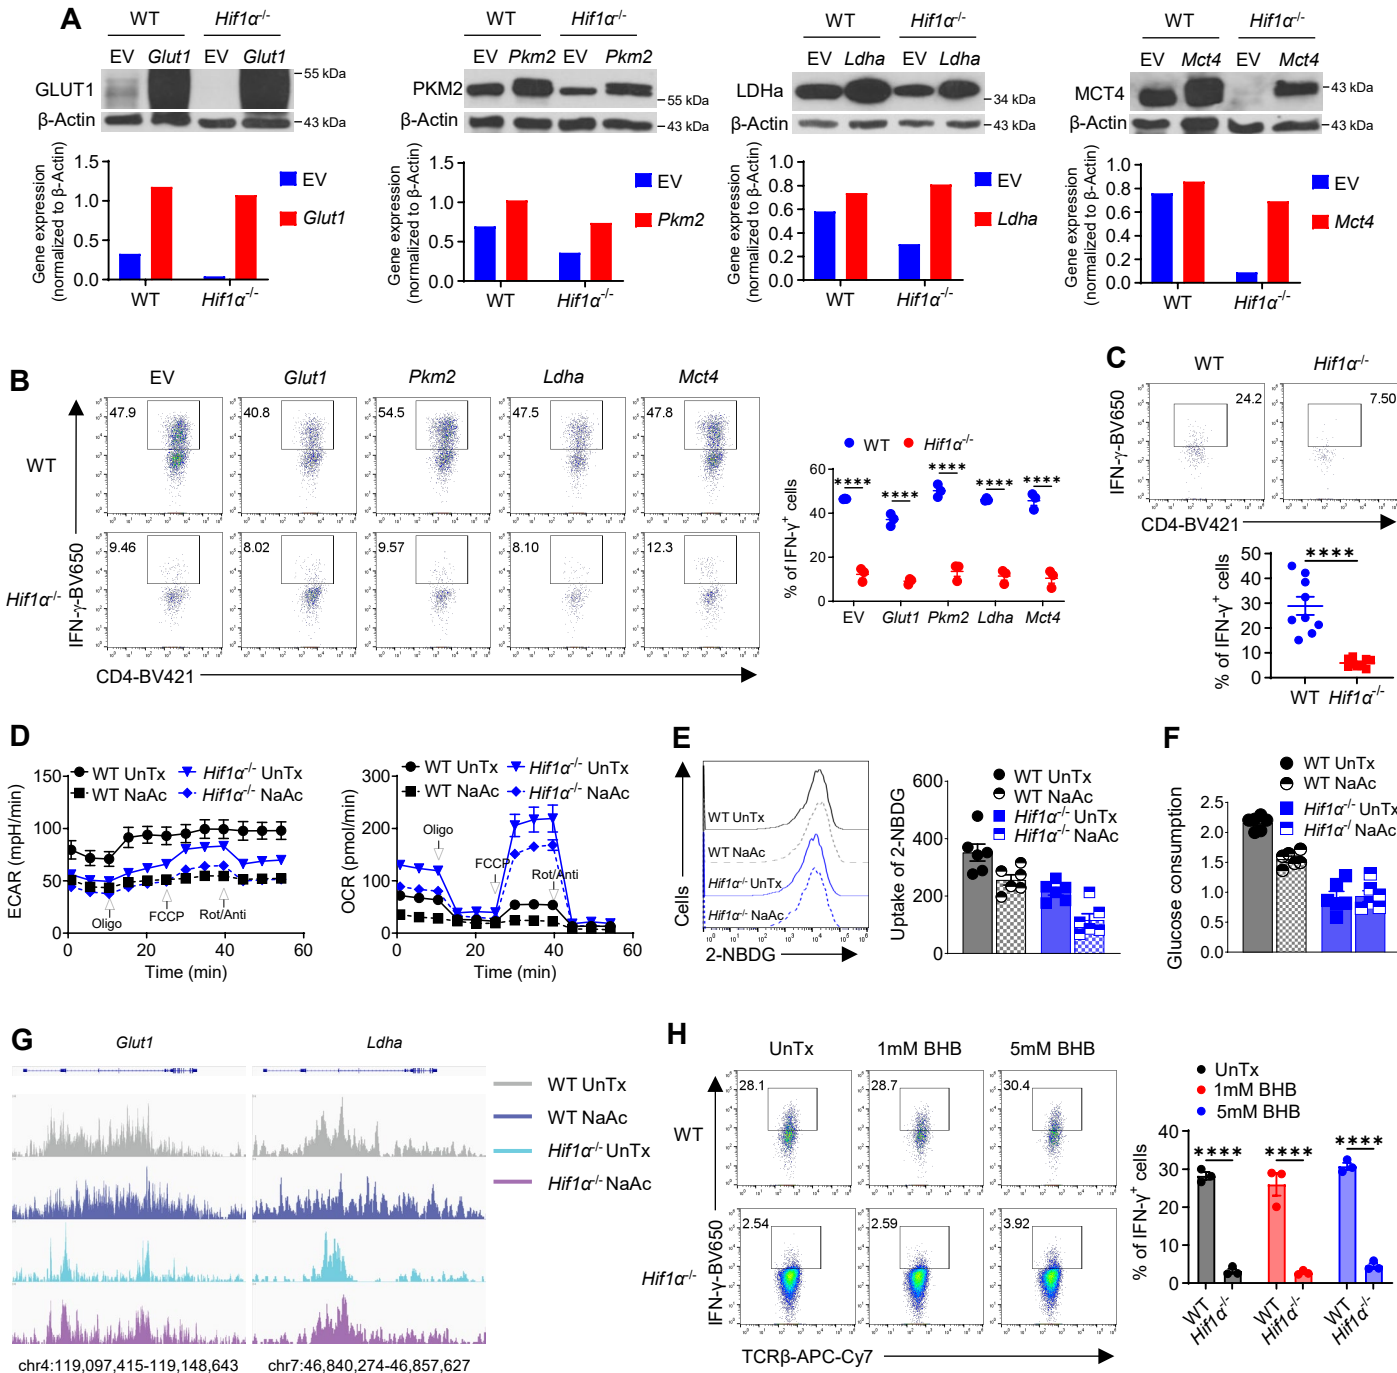

**Figure S3. Direct regulation of IFN- $\gamma$  induction in hypoxic T cells by *Hif1 $\alpha$*  and intracellular acetyl CoA, *in vitro*.**

**A.** Protein expression of GLUT1, PKM2, LDHa and MCT4 in activated WT and *Hif1 $\alpha$ <sup>-/-</sup>* CD4<sup>+</sup> T cells successfully transduced (GFP<sup>+</sup>) with empty retroviruses (EV) or retroviruses expressing *Glut1*, *Pkm2*, *Ldha*, or *Mct4*. **B.** GFP<sup>+</sup> T cells from (A) were activated under hypoxia for 5 days and analyzed for IFN- $\gamma$  production ( $N = 3$  per group, \*\*\*\* $p < 0.0001$ ). **C.** IFN- $\gamma$  production by activated WT and *Hif1 $\alpha$ <sup>-/-</sup>* CD4<sup>+</sup> T cells co-cultured with MB49 cells for 48h, under hypoxia ( $N = 9$  per group, \*\*\*\* $p < 0.0001$  by two-sided Student's t-test). **D-E.** Extracellular acidification rate (ECAR) and oxygen consumption rate (OCR) (D), uptake of 2-NBDG (E), and glucose consumption (F) ( $N = 6$  per group) by activated WT and *Hif1 $\alpha$ <sup>-/-</sup>* CD4<sup>+</sup> T cells treated with solvent (UnTx) or 20 mM of NaAc. **G.** H3K9Ac enrichment at *Glut1* and *Ldha* loci in activated WT and *Hif1 $\alpha$ <sup>-/-</sup>* CD4<sup>+</sup> T cells treated with solvent (UnTx) or 20 mM of NaAc. **H.** Activated WT and *Hif1 $\alpha$ <sup>-/-</sup>* CD4<sup>+</sup> T cells under hypoxia were treated with solvent (UnTx), 1mM, or 5mM BHB for 48h and analyzed for IFN- $\gamma$  production ( $N = 3$  per group, \*\*\*\* $p < 0.0001$ ). Two-way ANOVA with Šidák's multiple comparisons test (with adjustment) was used for B and G. All the experiments were repeated at least twice. Pooled results shown in the dot plots and bar graphs depicted means  $\pm$  SEM for all the samples in each group. Source data are provided as a Source Data file.

Supplemental Figure 4

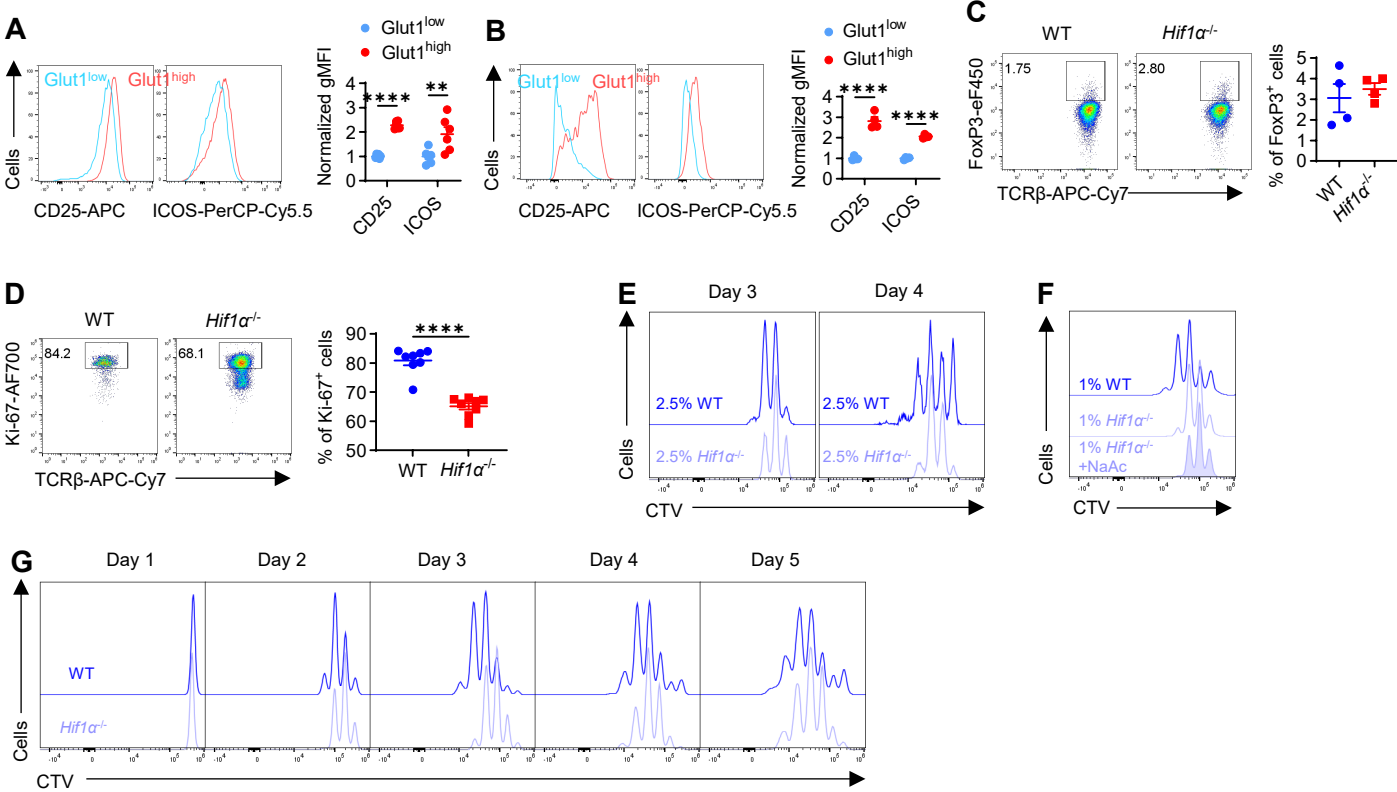

**Figure S4. Reduced IFN- $\gamma$  production by *Hif1 $\alpha$ <sup>-/-</sup>* T cells is not due to proliferative defect.**

**A-B.** Naïve WT CD4<sup>+</sup> (**A**) ( $N = 6$  per group, \*\*\*\* $p < 0.0001$ , \*\* $p = 0.0011$ ) and CD8<sup>+</sup> (**B**) ( $N = 4$  per group, \*\*\*\* $p < 0.0001$ ) T cells were activated under hypoxia for 3 days. Gated live Glut1<sup>low</sup> and Glut1<sup>high</sup> T cells were analyzed for the expression of ICOS and CD25 (gMFI: geometric mean fluorescence intensity). **C-D.** Naïve WT and *Hif1 $\alpha$ <sup>-/-</sup>* CD4<sup>+</sup> T cells activated under hypoxia were analyzed for FoxP3 (**C**) ( $N = 4$  per group) and Ki-67 (**D**) ( $N = 8$  per group, \*\*\*\* $p < 0.0001$  by two-sided Student's t-test). **E.** CellTrace Violet (CTV)-labeled naïve WT and *Hif1 $\alpha$ <sup>-/-</sup>* CD4<sup>+</sup> T cells were activated in 2.5% O<sub>2</sub>. CTV dilution were detected on day 3 and day 4 following activation. **F.** CTV dilution in activated WT and *Hif1 $\alpha$ <sup>-/-</sup>* CD4<sup>+</sup> T treated without or with NaAc (Day 3). **G.** CTV-labeled naïve WT and *Hif1 $\alpha$ <sup>-/-</sup>* CD8<sup>+</sup> T cells were activated under hypoxia. CTV dilution were detected daily from Day 1-5. Two-way ANOVA with Šídák's multiple comparisons test (with adjustment) was used for **A** and **B**. All the experiments were repeated at least twice. Pooled results shown in the dot plots depicted means  $\pm$  SEM for all the samples in each group, with each dot denoting an independent sample. Source data are provided as a Source Data file.

Supplemental Figure 5

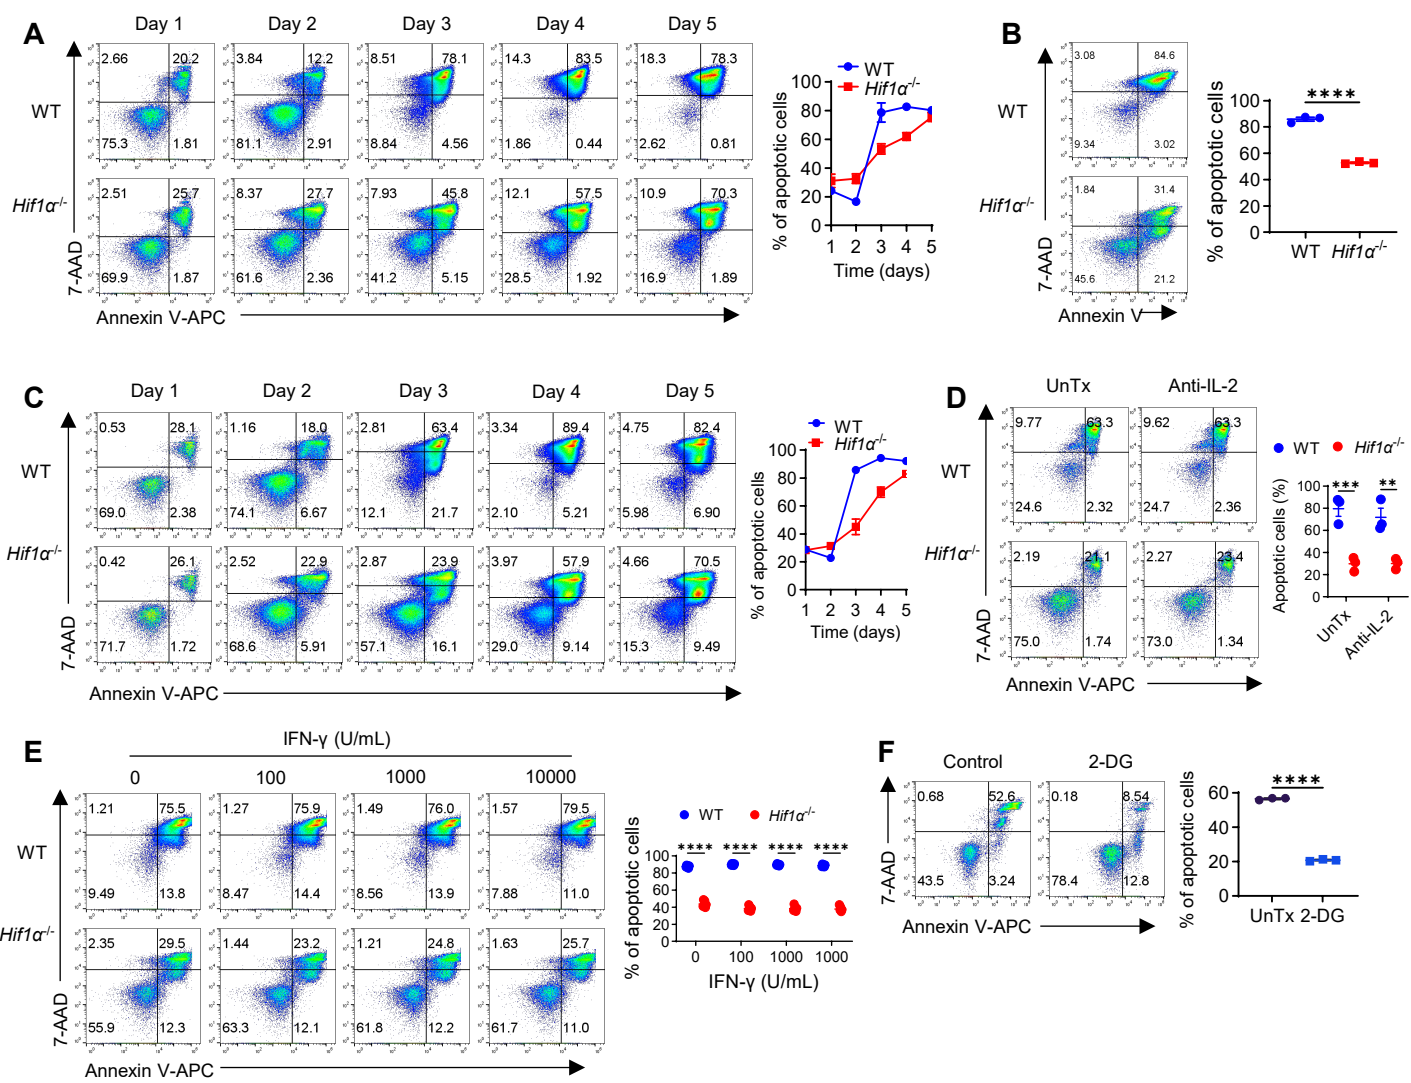

**Figure S5. Attenuated AICD in *Hif1α*<sup>-/-</sup> T cells is not mediated by extrinsic factors.**

**A.** Naïve WT CD4<sup>+</sup> T cells were activated under hypoxia (1% O<sub>2</sub>) and assessed cell death daily from Day 1-5 by staining for 7-AAD and Annexin V. The line graph on the right showed percentages of apoptotic cells.

**B.** Naïve WT CD4<sup>+</sup> T cells were activated under 2.5% O<sub>2</sub> for 3 days to assess cell death (\*\*\*\**p* < 0.0001).

**C.** Assays in (A) were repeated but with 50% of old media replaced by fresh media every day from Day 1-4.

**D-E.** Naïve WT and *Hif1α*<sup>-/-</sup> CD4<sup>+</sup> were activated under hypoxia for 3 days, with or without blocking antibodies against IL-2 (D) (\*\*\**p* = 0.0006, \*\**p* = 0.002), and with or without added IFN-γ (E) (\*\*\*\**p* < 0.0001) followed by analyses of cell death by 7-AAD and Annexin V staining.

**F.** Naïve human CD4<sup>+</sup> T cells isolated from PBMCs of healthy donors were activated under hypoxia for 3 days, in the absence and presence of 0.5mM 2-DG, followed by 7-AAD and Annexin V staining to detect cell death (\*\*\*\**p* < 0.0001). *N* = 6 per group in A and C; *N* = 3 per group in B, D, E and F. A two-sided Student's t-test was used in B and F for statistical analyses. Two-way ANOVA with Šidák's multiple comparisons test (with adjustment) was used for D and E. All the experiments were repeated at least twice. Pooled results shown in the dot plots depicted means ± SEM for all the samples in each group, with each dot denoting an independent sample. Source data are provided as a Source Data file.



Supplemental Figure 6

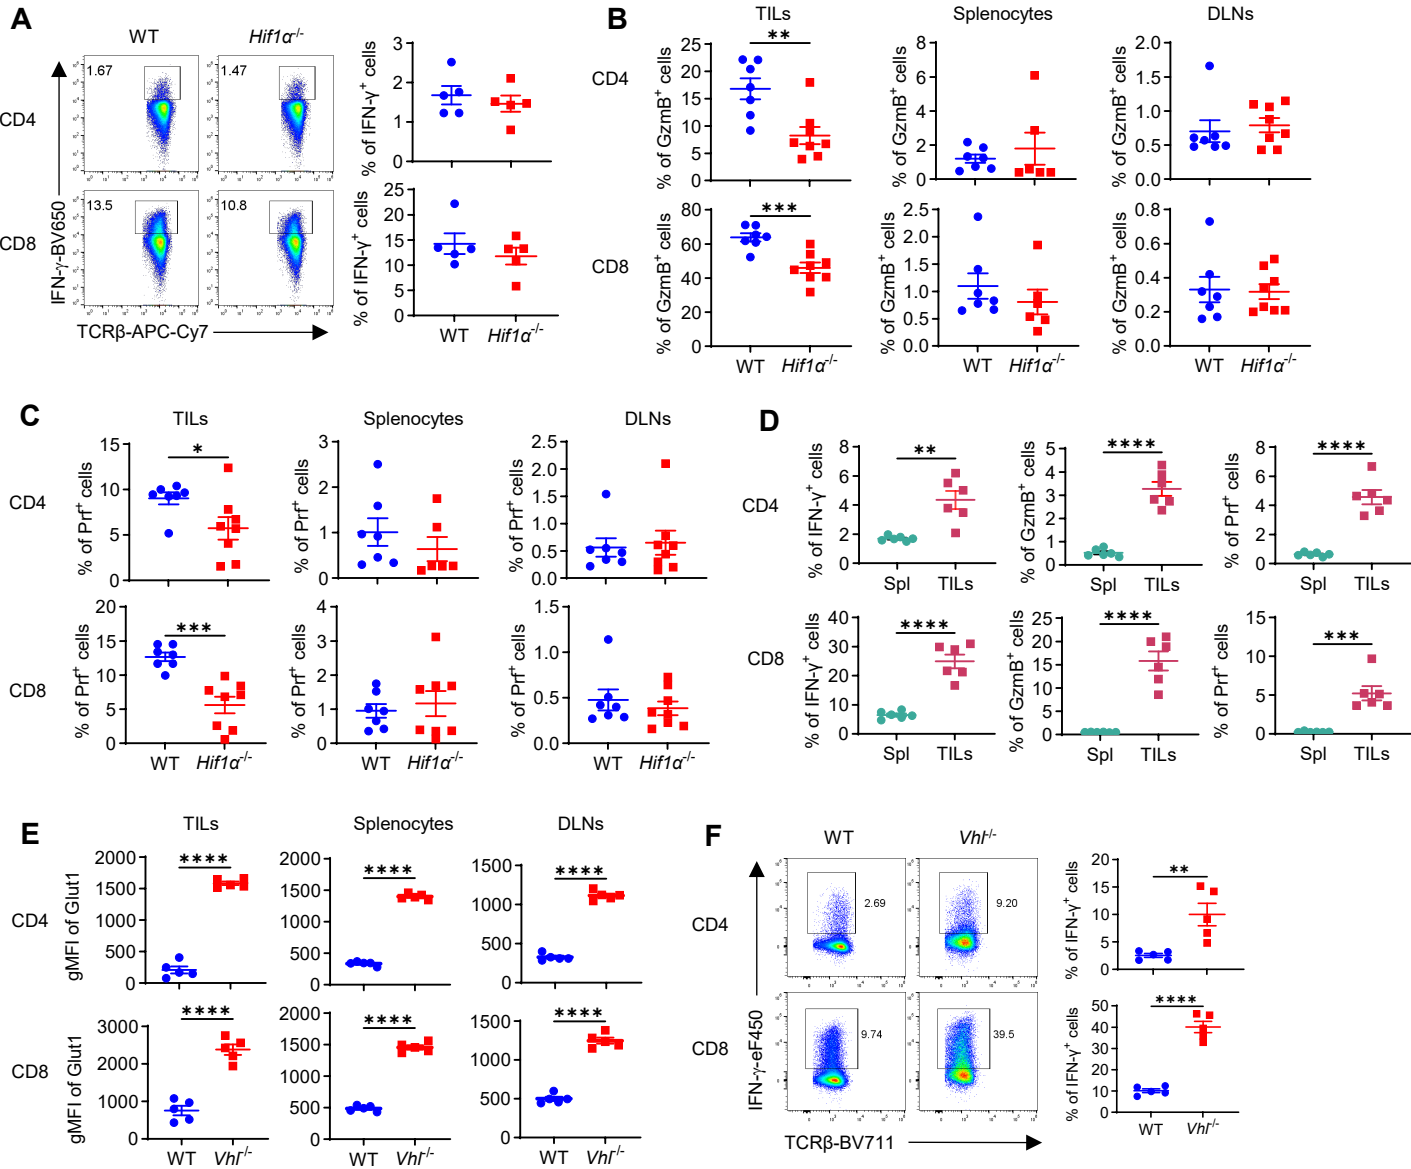

**Figure S6. *Hif1α* controls effector function of TILs.**

**A.** T cells isolated from draining lymph nodes (DLNs) of WT or *Hif1α<sup>-/-</sup>* mice bearing established MB49 bladder tumor were analyzed for IFN-γ production ( $N = 5$  per group). **B-C.** Production of GzmB (**B**) ( $N = 7$  per group,  $**p = 0.0041$ ,  $***p = 0.0007$ ) and Prf (**C**) ( $N = 7$  per group,  $*p = 0.0425$ ,  $***p = 0.0003$ ) by CD4<sup>+</sup> and CD8<sup>+</sup> TILs or CD4<sup>+</sup> and CD8<sup>+</sup> T cells from spleen and DLNs of WT or *Hif1α<sup>-/-</sup>* mice bearing established MB49 bladder tumor. **D.** Production of IFN-γ, GzmB, and Prf by CD4<sup>+</sup> and CD8<sup>+</sup> splenocytes versus CD4<sup>+</sup> and CD8<sup>+</sup> TILs, isolated from WT mice bearing MB49 bladder tumor ( $N = 6$  per group,  $**p = 0.0016$ ,  $***p = 0.0003$ ,  $****p < 0.0001$ ). **E-F.** T cells isolated from WT or *Vhl<sup>-/-</sup>* mice bearing established MB49 bladder tumor were analyzed for Glut1 expression (**E**) ( $N = 5$  per group,  $****p < 0.0001$ ) in CD4<sup>+</sup> and CD8<sup>+</sup> TILs, splenocytes, and DLNs, as well as IFN-γ production by DLN CD4<sup>+</sup> and CD8<sup>+</sup> T cells (**F**) ( $N = 5$  per group,  $**p = 0.007$ ,  $****p < 0.0001$ ). A two-sided Student's t-test was used in **A-F** for statistical analyses. All the experiments were repeated 2-5 times. Pooled results shown in the dot plots depicted means  $\pm$  SEM for all the mice in each group, with each dot denoting an individual mouse. Source data are provided as a Source Data file.



Supplemental Figure 7

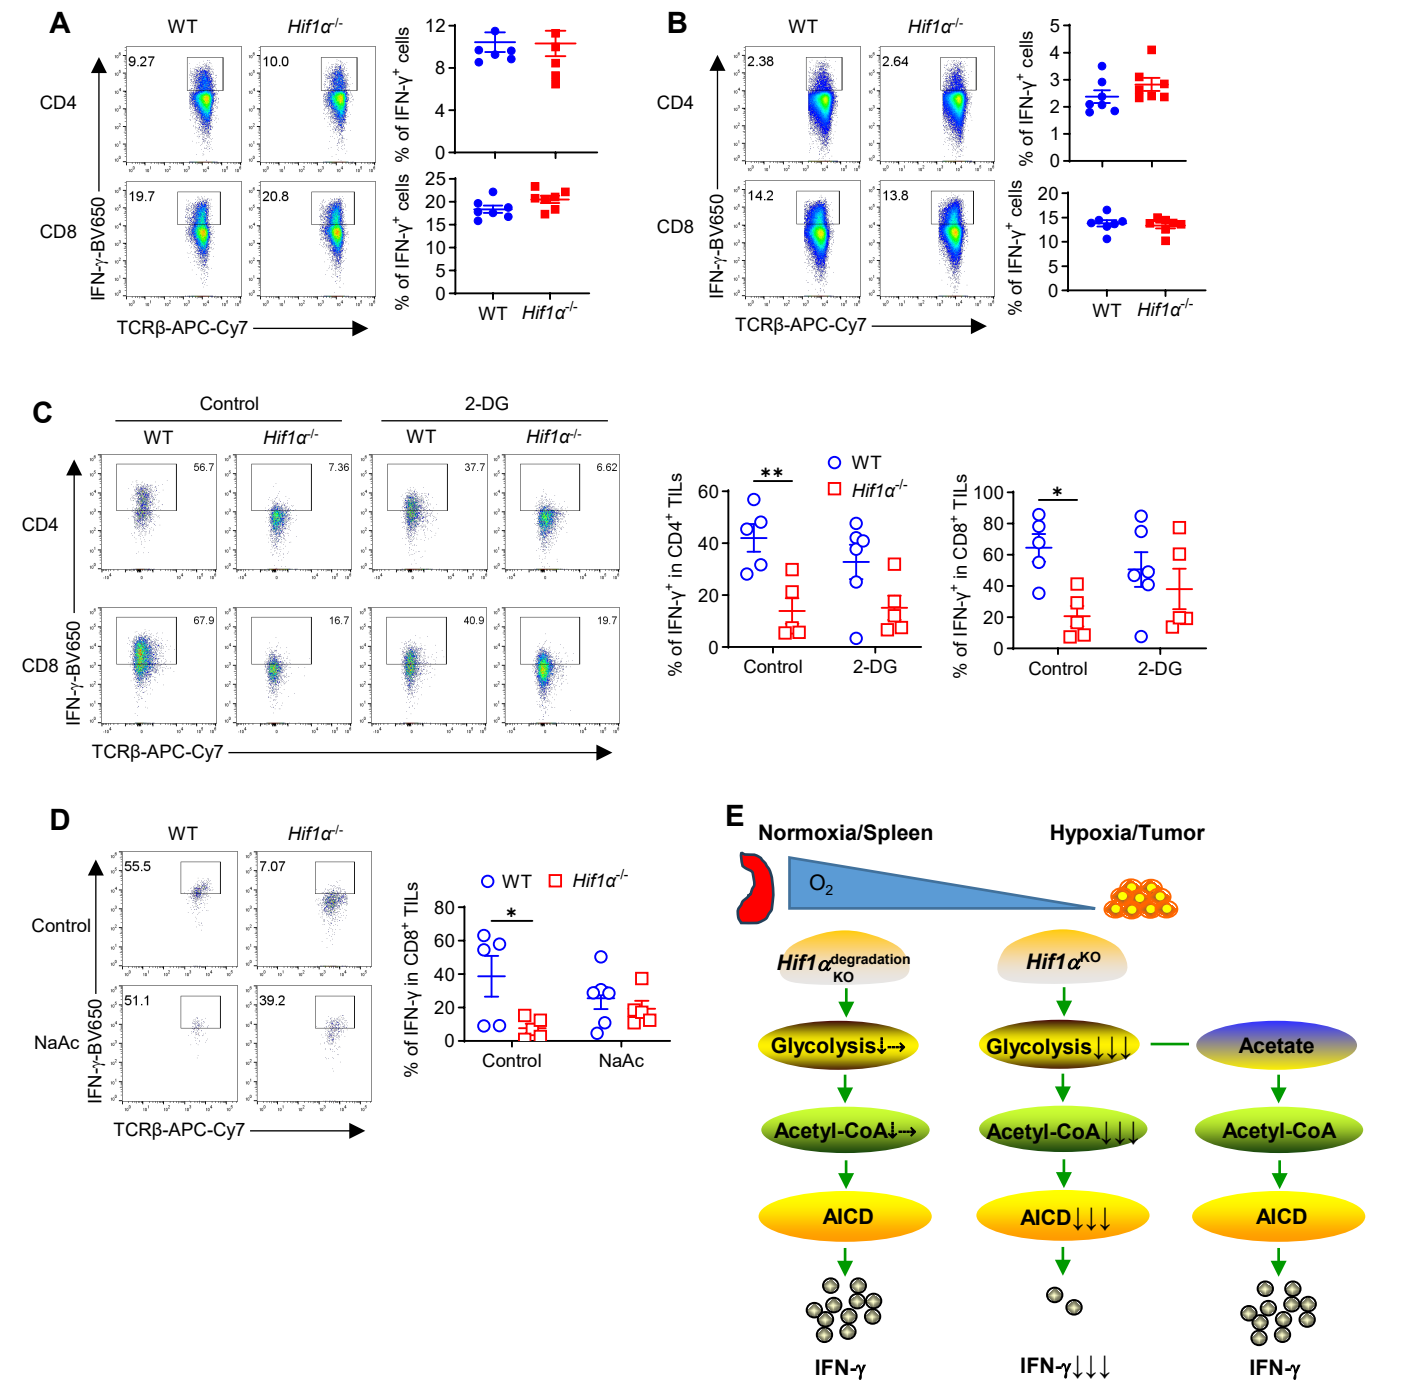

**Figure S7. *Hif1 $\alpha$*  in T cells governs therapeutic effects of ICB.**  
**A-B.** WT and *Hif1 $\alpha$ <sup>-/-</sup>* mice bearing palpable MB49 bladder tumor were treated with combined anti-CTLA-4+anti-PD-1 (ICB). IFN- $\gamma$  production by CD4<sup>+</sup> and CD8<sup>+</sup> T cells from spleens (**A**) (*N* = 7 per group) and draining lymph nodes (DLNs) (**B**) (*N* = 7 per group) was shown. **C.** IFN- $\gamma$  production by CD4<sup>+</sup> and CD8<sup>+</sup> TILs from MB49 bladder tumor-bearing WT and *Hif1 $\alpha$ <sup>-/-</sup>* mice treated with ICB alone or in conjunction with administration of 2-DG (*N* = 5 per group, \*\**p* = 0.006, \**p* = 0.0183). **D.** IFN- $\gamma$  production by CD8<sup>+</sup> TILs from MB49 bladder tumor-bearing WT and *Hif1 $\alpha$ <sup>-/-</sup>* mice treated with ICB alone or in conjunction with administration of sodium acetate (NaAc) (*N* = 5 per group, \**p* = 0.0277). **E.** A proposed model of how T cell-intrinsic *Hif1 $\alpha$* -glycolysis controls IFN- $\gamma$  production in hypoxic T cells. Two-way ANOVA with Šídák's multiple comparisons test (with adjustment) was used for **C-D**. All the experiments were repeated 2-5 times. Pooled results shown in the dot plots depicted means ± SEM for all the mice in each group, with each dot denoting an individual mouse. Source data are provided as a Source Data file.

Supplementary Figure 8 FACS gating strategies

FACS strategy 1: for splenocytes, DLN, and cultured cells.

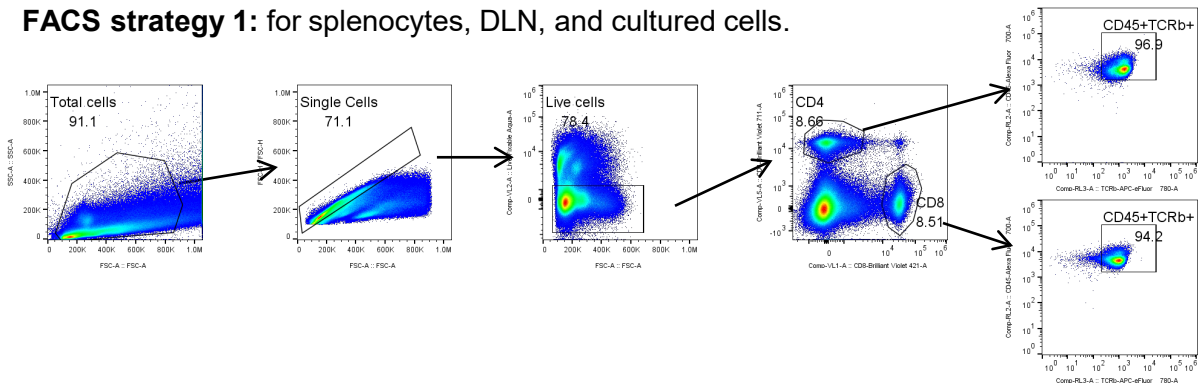

FACS strategy 2. for single cell suspensions of tumors.

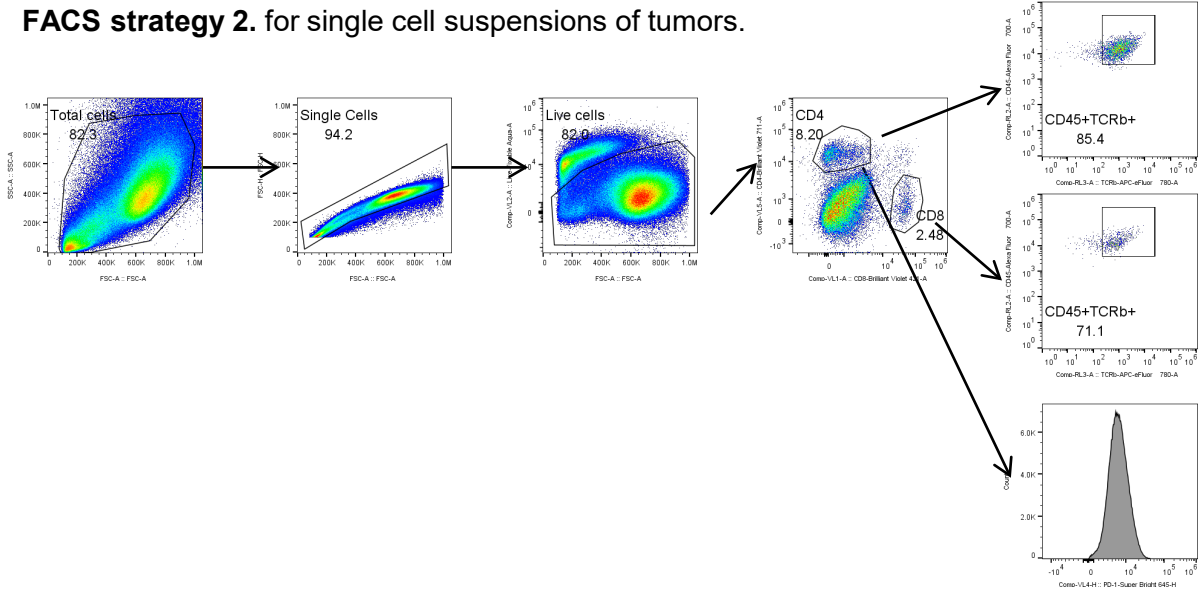

Supplementary Figure 8 FACS gating strategies

FACS strategy 1 was used in all panels from Figures 1-5, 6A, 6C, 6E. Supplemental Figures S1-S5, S6A, S6F, S7A and S7B .

FACS strategy 2 was used in Figures 6B, 6D, 6F, 7C, 7G, Supplemental Figures S7C and S7B.

**Supplemental Table 1. List of flow antibodies used in this manuscript.**

| Antibodies                              | Clone    | Source         | Identifier   | Antibody dilution |
|-----------------------------------------|----------|----------------|--------------|-------------------|
| Anti-Mouse CD8 Brilliant Violet 785™    | 53-6.7   | BD Biosciences | #563332      | 1/200             |
| Anti-Mouse CD4 Brilliant Violet 421™    | RM4-5    | BioLegend      | #100544      | 1/200             |
| Anti-Mouse CD45 PerCP-Cyanine5.5        | 30-F11   | Thermo Fisher  | #45-0451-82  | 1/200             |
| Anti-Mouse CD45.1 PerCP-Cyanine5.5      | A20      | BioLegend      | #110728      | 1/200             |
| Anti-Mouse CD45.2 Alexa Fluor® 700      | 104      | BioLegend      | #109822      | 1/200             |
| Anti-Mouse TCRβ APC-Cy7                 | H57-597  | BioLegend      | #109220      | 1/200             |
| Anti-Mouse Perforin PE                  | S16009A  | BioLegend      | #154306      | 1/100             |
| Anti-Mouse Granzyme B FITC              | QA16A02  | BioLegend      | #372206      | 1/100             |
| Anti-Mouse IFN-γ Brilliant Violet 650™  | XMG1.2   | BioLegend      | #505832      | 1/100             |
| Anti-Mouse IL-2 Brilliant Violet 711™   | JES6-5H4 | BioLegend      | #503837      | 1/100             |
| Anti-Mouse T-bet Brilliant Violet 711™  | 4B10     | BioLegend      | #644820      | 1/100             |
| Anti-Mouse ICOS PerCP-Cyanine5.5        | 7E.17G9  | BioLegend      | #117424      | 1/200             |
| Anti-Mouse CD25 APC                     | PC61.5   | Thermo Fisher  | #17-0251-82  | 1/200             |
| Anti-Mouse FoxP3 eFluor™ 450            | FJK-16s  | Thermo Fisher  | #48-5773-82  | 1/100             |
| Anti-Mouse HIF1α APC                    | Mgc3     | Thermo Fisher  | #17-7528-82  | 1/100             |
| Anti-Mouse Ki-67 Alexa Fluor® 700       | SolA15   | Thermo Fisher  | #56-5698-82  | 1/100             |
| Anti-Mouse RORγt Brilliant Violet 650™  | Q31-378  | BD Biosciences | # 564722     | 1/100             |
| Anti-Human/Mouse Gata-3 eFluor™ 660     | TWAI     | Thermo Fisher  | # 50-9966-42 | 1/100             |
| Anti-Human/Mouse Glut1 Alexa Fluor® 405 | EPR3915  | Abcam          | #ab210438    | 1/100             |
| Anti-Human CD3 Super Bright™ 702        | OKT3     | Thermo Fisher  | #67-0037-42  | 1/200             |
| Anti-Human IFN-γ Brilliant Violet 605™  | B27      | BD Biosciences | #562974      | 1/100             |
| Anti-Human CD4 Brilliant Violet 650™    | L200     | BD Biosciences | #563737      | 1/200             |

**Supplemental Table 2. List of Western Blot antibodies used in this manuscript.**

| <b>Name</b>          | <b>Clone</b> | <b>Source</b>             | <b>Catalog</b> | <b>Antibody dilution</b> |
|----------------------|--------------|---------------------------|----------------|--------------------------|
| HIF-1 $\alpha$       | D2U3T        | Cell Signaling Technology | 14179          | 1/1000                   |
| HIF-2 $\alpha$       | E2N9W        | Cell Signaling Technology | 57921          | 1/1000                   |
| Glut1                | polyclonal   | Sigma                     | 07-1401        | 1/1000                   |
| Hk2                  | C64G5        | Cell Signaling Technology | 2867           | 1/1000                   |
| Ldha                 | Polyclonal   | Cell Signaling Technology | 2012           | 1/1000                   |
| Pkm2                 | D78A4        | Cell Signaling Technology | 4053           | 1/1000                   |
| Mct4                 | D-1          | Santa Cruz Biotechnology  | sc-376140      | 1/1000                   |
| PDH                  | C54G1        | Cell Signaling Technology | 3205           | 1/1000                   |
| phospho-PDH (Ser293) | E4V9L        | Cell Signaling Technology | 37115          | 1/1000                   |
| $\beta$ -Actin       | C-4          | Santa Cruz Biotechnology  | sc-47778 HRP   | 1/10000                  |

**Supplemental Table 3. List of real-time PCR primers used in this manuscript.**

| <b>Gene name</b>               | <b>Forward primer</b>   | <b>Reverse primer</b>   |
|--------------------------------|-------------------------|-------------------------|
| <i>Hif1<math>\alpha</math></i> | AGCTTCTGTTATGAGGCTCACC  | TGACTTGATGTTTCATCGTCCTC |
| <i>Hif2<math>\alpha</math></i> | TGAGTTGGCTCATGAGTTGC    | TTGCTGATGTTTTCCGACAG    |
| <i>Glut1</i>                   | CAGTTCGGCTATAAACTGGTG   | GCCCCGACAGAGAAGATG      |
| <i>Hk2</i>                     | TGATCGCCTGCTTATTCACGG   | AACCGCCTAGAAATCTCCAGA   |
| <i>Gpi</i>                     | TCAAGCTGCGGAACTTTTTG    | GGTTCTTGGAGTAGTCCACCAG  |
| <i>Tpi1</i>                    | CCAGGAAGTTCTTCGTTGGGG   | CAAAGTCGATGTAAGCGGTGG   |
| <i>Pkm2</i>                    | GCCGCCTGGACATTGACTC     | CCATGAGAGAAATTCAGCCGAG  |
| <i>Eno1</i>                    | TGCGTCCACTGGCATCTAC     | CAGAGCAGGCGCAATAGTTTTA  |
| <i>Ldha</i>                    | CATTGTCAAGTACAGTCCACACT | TTCCAATTACTCGGTTTTTGGGA |
| <i>Mct4</i>                    | TCACGGGTTTCTCCTACGC     | GCCAAAGCGGTTACACAC      |
| <i>Actin</i>                   | CATTGCTGACAGGATGCAGAAGG | TGCTGGAAGGTGGACAGTGAGG  |
